# Supplementary material for: Clinical Manifestation, Management, and Outcomes in Patients with COVID-19 Vaccine-Induced Acute Encephalitis: Two Case Reports and a Literature Review
Source: MDPI journal article supplement (doi:10.3390/vaccines10081230), 2022-07-31
Supplement: s1 [file s1]

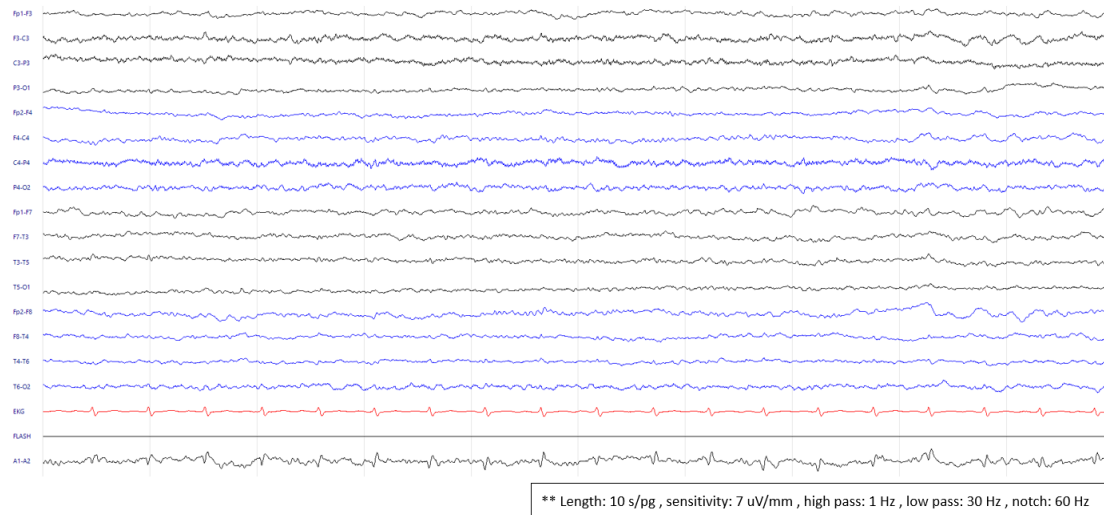

**Supplementary Figure S1.** Electroencephalogram demonstrated a continuous diffuse slowing in the theta and delta ranges (Case 2).

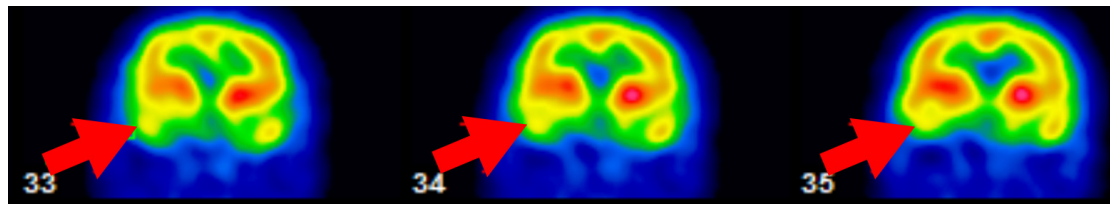

**Supplementary Figure S2.** The cerebral perfusion scan with single-photon emission computed tomography (SPECT) that indicated hypoperfusion in the right temporal region (Case 2).
